# Supplementary material for: Adsorption and desorption mechanism of aromatic VOCs onto porous carbon adsorbents for emission control and resource recovery: recent progress and challenges
Source: Royal Society of Chemistry journal article supplement (doi:10.1039/d1en00929j), 2021-11-15
Supplement: d1en00929j1.pdf [file d1en00929j1.pdf]

## Supporting Information:

### Adsorption and Desorption Mechanism of Aromatic VOCs onto Porous Carbon Adsorbents for Emission Control and Resource Recovery: Recent Progress and Challenges

Weiping Zhang<sup>a,b</sup>, Guiying Li<sup>a,b</sup>, Huajie Yin<sup>c</sup>, Kun Zhao<sup>d</sup>, Huijun Zhao<sup>c</sup>, Taicheng An<sup>a,b\*</sup>

<sup>a</sup> *Guangdong Key Laboratory of Environmental Catalysis and Health Risk Control, Guangdong-Hong Kong-Macao Joint Laboratory for Contaminants Exposure and Health, Institute of Environmental Health and Pollution control, Guangdong University of Technology, Guangzhou 510006, China.*

<sup>b</sup> *Guangzhou Key Laboratory of Environmental Catalysis and Pollution Control, Guangdong Engineering Technology Research Center for Photocatalytic Technology Integration and Equipment, School of Environmental Science and Engineering, Guangdong University of Technology, Guangzhou 510006, China.*

<sup>c</sup> *Centre for Clean Environment and Energy, Gold Coast Campus, Griffith University, Queensland 4222, Australia.*

<sup>d</sup> *School of Environmental Science and Engineering, North China Electric Power University, Baoding, 071003, China.*

**\*Corresponding Author: Prof. Taicheng An**, Tel: +86-20-39322298; E-mail: [antc99@gdut.edu.cn](mailto:antc99@gdut.edu.cn)

**Table S1. Aromatic VOCs emission from petroleum industry.**

| Emission source    | Section                    | Representatives                                                                                                                           | Emission contribution | Ref. |
|--------------------|----------------------------|-------------------------------------------------------------------------------------------------------------------------------------------|-----------------------|------|
| Petroleum industry | Petrochemical plant        | Benzene, toluene,                                                                                                                         | 5.9wt%                | 1    |
|                    | Basic chemical plant       | Styrene, toluene, benzene                                                                                                                 | 29.3wt%               |      |
|                    | Chlorinated chemical plant | Toluene, ethylbenzene, Styrene, <i>m/p</i> -xylene                                                                                        | 29.1wt%               |      |
|                    | Refining area              | Toluene, benzene                                                                                                                          | 6.5wt%                | 2    |
|                    | Basic chemical area        | <i>p</i> -Diethylbenzene, <i>m</i> -diethylbenzene, <i>o</i> -ethyltoluene, 1,2,4-trimethylbenzene, propylbenzene, 1,3,5-trimethylbenzene | 28.9wt%               |      |
|                    | Wastewater treatment       | <i>p</i> -Diethylbenzene, 1,2,4-trimethylbenzene, <i>o</i> -ethyltoluene                                                                  | 12.3wt%               |      |
|                    | Wastewater treatment       | Benzene, toluene, <i>m/p</i> -xylene                                                                                                      | 35.9vol%              | 3    |
|                    | Coke production            | Benzene, toluene, <i>m/p</i> -xylene                                                                                                      | 28.6wt%               | 4    |
|                    |                            | Toluene, benzene, <i>m</i> -ethyltoluene, ethylbenzene, <i>m/p</i> -xylene                                                                | 43.8wt%               | 5    |

**Table S2. Aromatic VOCs emission during storage and transportation.**

| <b>Emission source</b>     | <b>Section</b>  | <b>Representatives</b>                                                                                                                                       | <b>Emission contribution</b> | <b>Ref.</b> |
|----------------------------|-----------------|--------------------------------------------------------------------------------------------------------------------------------------------------------------|------------------------------|-------------|
| Storage and transportation | Organic liquids | Toluene, benzene, <i>m</i> -xylene, ethylbenzene, 1,2,4-trimethylbenzene, isopropylbenzene                                                                   | 54.5wt%                      | 6           |
|                            | Crude oil       | <i>m/p</i> -Xylene, toluene, benzene, o-xylene, ethylbenzene                                                                                                 | 22.6wt%                      |             |
|                            | Fuel oil        | <i>m/p</i> -Xylene, toluene, benzene, ethylbenzene, o-xylene, 1,3,5-trimethylbenzene                                                                         | 38.7wt%                      | 7           |
|                            | Diesel oil      | <i>m</i> -ethyltoluene, 1,3,5-trimethylbenzene, 1,2,3-trimethylbenzene, <i>p</i> -ethyltoluene, <i>o</i> -ethyltoluene, toluene, <i>m/p</i> -xylene, benzene | 44.6wt%                      |             |

**Table S3. Aromatic VOCs emission from paint manufacturing.**

| <b>Emission source</b> | <b>Section</b>    | <b>Representatives</b>                                               | <b>Emission contribution</b> | <b>Ref.</b> |
|------------------------|-------------------|----------------------------------------------------------------------|------------------------------|-------------|
| Paint manufacturing    | Paint solvent     | Toluene, <i>m/p</i> -xylene, <i>o</i> -xylene                        | 95.0wt%                      | 8           |
|                        | Fugitive emission | Toluene, <i>m/p</i> -xylene, ethylbenzene                            | 24.0wt%                      | 9           |
|                        | Stacking emission | Ethylbenzene, <i>m/p</i> -xylene, toluene, styrene, <i>o</i> -xylene | 39.0wt%                      | 10          |
|                        | ---               | <i>o</i> -Xylene, ethylbenzene, toluene, <i>m/p</i> -xylene, styrene | 44.6wt%                      | 7           |

**Table S4. Aromatic VOCs emission from surface coating industry.**

| Emission source          | Section                    | Representatives                                                                                                                                         | Emission contribution | Ref. |
|--------------------------|----------------------------|---------------------------------------------------------------------------------------------------------------------------------------------------------|-----------------------|------|
| Surface coating industry | Wood furniture industry    | Ethylbenzene, o-xylene, 1,2,4-trimethylbenzene, toluene                                                                                                 | 71.1wt%               | 11   |
|                          | Furniture painting         | Ethylbenzene, o-xylene, 1,2,4-trimethylbenzene, <i>m/p</i> -ethyltoluene, styrene, toluene, <i>m/p</i> -xylene, 1,3,5-trimethylbenzene, n-propylbenzene | 81.5wt%               | 4    |
|                          |                            | <i>o</i> -Xylene, toluene, 1,2,4-trimethylbenzene, Ethylbenzene, <i>m/p</i> -xylene, <i>m/p/o</i> -ethyltoluene, 1,3,5-trimethylbenzene, propylbenzene  | 87.8wt%               |      |
|                          |                            | <i>m/p</i> -xylene, toluene, ethylbenzene                                                                                                               | 65.2wt%               |      |
|                          | Wood furniture             | <i>m/p</i> -xylene, toluene, ethylbenzene                                                                                                               | 65.2wt%               | 12   |
|                          | Metal surface              | Toluene, ethylbenzene, <i>m/p</i> -xylene                                                                                                               | 63.5wt%               |      |
|                          | Plastic surface            | Toluene, <i>m/p</i> -xylene, ethylbenzene                                                                                                               | 39.5wt%               |      |
|                          | Fabric surface             | Toluene, styrene, <i>m/p</i> -xylene                                                                                                                    | 43.2wt%               |      |
|                          | Wood furniture             | Styrene, ethylbenzene, toluene, <i>m/p</i> -xylene, <i>o</i> -xylene, <i>m</i> -ethyltoluene                                                            | 60.4wt%               | 10   |
|                          | Metal surface              | Toluene, ethylbenzene, <i>m/p</i> -xylene, styrene, <i>m</i> -ethyltoluene                                                                              | 51.2wt%               |      |
|                          | Auto painting              | <i>m/p</i> -Xylene, ethylbenzene<br><i>o</i> -xylene, toluene, 1,2,4-trimethylbenzene, <i>o/m/p</i> -ethyltoluene                                       | 93.5wt%               | 9    |
|                          | Water-based emulsion Paint | 1-ethyl-3-methylbenzene, 1,2,4-trimethylbenzene, 1,3,5-trimethylbenzene, propylbenzene, <i>o</i> -xylene, toluene                                       | 72.9wt%               | 13   |

|                        |                                                                                                                             |          |    |
|------------------------|-----------------------------------------------------------------------------------------------------------------------------|----------|----|
| Ship manufacture       | xylene                                                                                                                      | 22.13wt% | 7  |
|                        | <i>m/p</i> -Xylene, ethylbenzene, <i>o</i> -xylene                                                                          | 91.6wt%  | 12 |
| Automobile manufacture | Toluene, ethylbenzene, <i>p</i> -xylene                                                                                     | 48.3wt%  |    |
| Truck manufacture      | Ethylbenzene, <i>o</i> -xylene, <i>p</i> -xylene, 1-ethyl-3-dimethylbenzene, 1,2,4-trimethylbenzene, 1,3,5-trimethylbenzene | 34.0wt%  | 14 |
|                        | Ethylbenzene, styrene, xylene, toluene, benzene                                                                             | 43.4wt%  | 15 |
| Automobile manufacture | Ethylbenzene, xylene, toluene, styrene, benzene                                                                             | 43.2wt%  | 16 |
|                        | Toluene, benzene                                                                                                            | 46.5wt%  | 17 |
|                        | Benzene, <i>m/p</i> -xylene<br>1,2,4-trimethylbenzene                                                                       | 67.0wt%  | 12 |

---

**Table S5. Aromatic VOCs emission from printing industry.**

| <b>Emission source</b> | <b>Section</b>           | <b>Representatives</b>                                                                                                                                                    | <b>Emission contribution</b> | <b>Ref.</b> |
|------------------------|--------------------------|---------------------------------------------------------------------------------------------------------------------------------------------------------------------------|------------------------------|-------------|
| Printing industry      | Offset printing facility | 1,2,4-trimethylbenzene, 1,3,5-trimethylbenzene, propylbenzene, <i>o</i> -xylene, isopropylbenzene, <i>p</i> -xylene, <i>p</i> -isopropyltoluene, <i>sec</i> -butylbenzene | 99.1wt%                      | 18          |
|                        | Print plant              | 1,2,4-trimethylbenzene, ethylbenzene, <i>m</i> -ethyltoluene, <i>m/p</i> -xylene, <i>o</i> -xylene, <i>p</i> -ethyltoluene, toluene                                       | 47.4wt%                      | 4           |
|                        | Flexographic printing    | <i>o</i> -Xylene                                                                                                                                                          | 35.5wt%                      | 14          |
|                        | Letterpress printing     | Ethylbenzene, <i>m/p</i> -xylene, toluene, styrene, benzene                                                                                                               | 51.1wt%                      | 10          |
|                        | Printing ink             | <i>m/p</i> -Xylene, ethylbenzene, <i>o</i> -xylene, toluene                                                                                                               | 31.8wt%                      | 19          |
|                        | Printing factory         | <i>m/p</i> -Xylene, toluene, 1,2,4-trimethylbenzene, <i>p</i> -diethylbenzene                                                                                             | 31.6wt%                      | 20          |

**Table S6. Aromatic VOCs emission from other source profiles.**

| Emission source                       | Section                  | Representatives                                                                              | Emission contribution | Ref. |
|---------------------------------------|--------------------------|----------------------------------------------------------------------------------------------|-----------------------|------|
|                                       | Wastewater treatment     | Toluene, <i>m/p</i> -xylene, ethylbenzene                                                    | 46.5wt%               | 9    |
| Medicine producing                    | Producing lines          | Toluene, <i>m/p</i> -xylene, ethylbenzene, <i>o</i> -xylene, benzene                         | 15.0wt%               |      |
|                                       | Centrifugation           | Toluene, <i>m/p</i> -xylene, ethylbenzene                                                    | 9.6wt%                |      |
| Plastic producing                     | Polypropylene            | <i>m/p</i> -Xylene, ethylbenzene, <i>o</i> -xylene, toluene                                  | 97.6wt%               | 21   |
|                                       | Polyethylene             | <i>m/p</i> -Xylene, ethylbenzene, <i>o</i> -xylene, toluene                                  | 98.8wt%               |      |
| Synthetic rubber/fiber                | Butadiene styrene rubber | Styrene, benzene, <i>m/p</i> -xylene, ethylbenzene                                           | 26.0wt%               |      |
|                                       | Cellulose acetate fiber  | Toluene, benzene, ethylbenzene, <i>m/p</i> -xylene                                           | 27.3wt%               | 7    |
| Manufacture of Chemical raw materials | ---                      | <i>m/p</i> -Xylene, <i>o</i> -xylene, toluene, ethylbenzene, benzene, 1,2,4-trimethylbenzene | 28.0wt%               |      |
|                                       | Coal combustion          | Benzene, toluene, ethylbenzene, <i>m/p</i> -xylene, <i>o</i> -xylene                         | 29.1wt%               |      |
|                                       | Fuel oil combustion      | Benzene, toluene                                                                             | 12.8wt%               | 10   |
| Boiler                                | Natural gas combustion   | Benzene, toluene, <i>m/p</i> -xylene, ethylbenzene                                           | 72.0wt%               |      |
|                                       | Liquefied petroleum gas  | Styrene, benzene, toluene, <i>m/p</i> -xylene                                                | 85.1wt%               |      |
|                                       | Waste                    | <i>m/p</i> -Xylene, <i>o</i> -xylene, ethylbenzene                                           | 37.9wt%               | 10   |
| Shoemaking                            | Fugitive emission        | Toluene                                                                                      | 25.5wt%               |      |



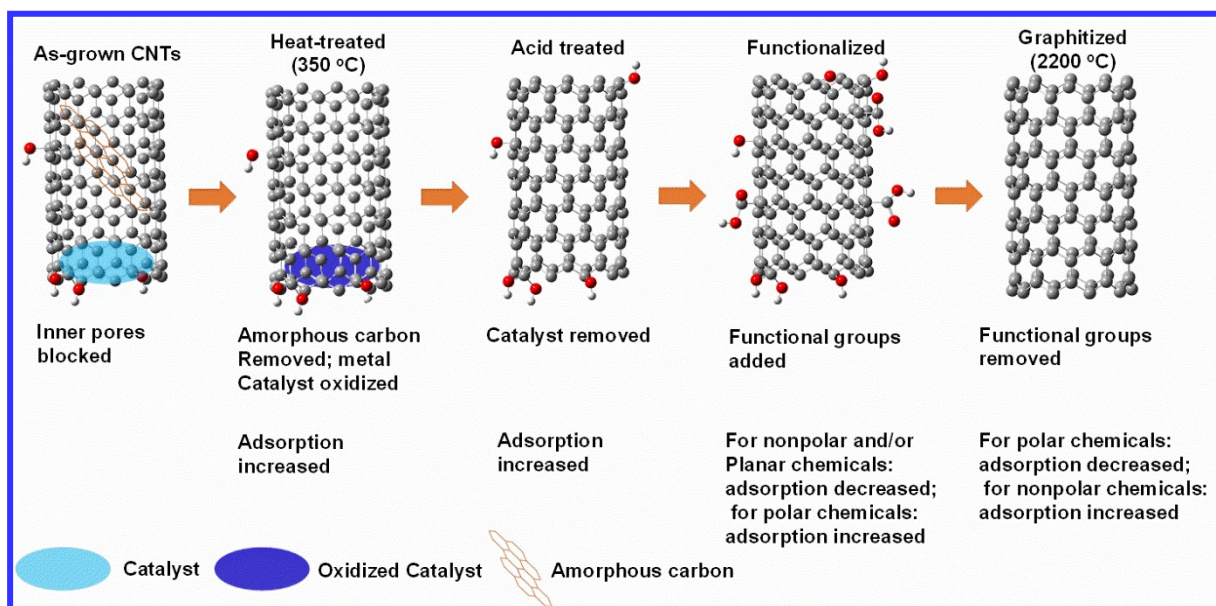

**Fig. S1** Adsorption properties as affected by CNT functional groups. This figure shows the general trend for the changes of CNT adsorption properties after different treatments. The surfaces of raw CNTs are hydrophobic as is demonstrated by the strong preference for the adsorption of hydrocarbons (such as hexane, benzene, and cyclohexane) over alcohols (such as ethanol, 2-propanol). Functionalization will lead to increased oxygen content, decreased surface area, and reduced adsorption of nonpolar hydrocarbons due to reduced hydrophobicity, and so will planar chemicals due to insufficient contact between CNT and the chemical. Graphitization will eliminate functional groups, and decrease the adsorption of polar chemicals, but will increase the adsorption of nonpolar and/or planar hydrocarbons (adapted with permission from ref. 22. Copyright 2008 American Chemical Society.)

## References

1. Z. Mo, M. Shao, S. Lu, H. Qu, M. Zhou, J. Sun and B. Gou, Process-specific emission characteristics of volatile organic compounds (VOCs) from petrochemical facilities in the Yangtze River Delta, China, *Sci. Total Environ.*, 2015, **533**, 422-431.
2. Z. Zhang, X. Yan, F. Gao, P. Thai, H. Wang, D. Chen, L. Zhou, D. Gong, Q. Li, L. Morawska and B. Wang, Emission and health risk assessment of volatile organic compounds in various processes of a petroleum refinery in the Pearl River Delta, China, *Environ. Pollut.*, 2018, **238**, 452-461.
3. W. Wei, S. Cheng, G. Li, G. Wang and H. Wang, Characteristics of volatile organic compounds (VOCs) emitted from a petroleum refinery in Beijing, China, *Atmos. Environ.*, 2014, **89**, 358-366.
4. G. Li, W. Wei, X. Shao, L. Nie, H. Wang, X. Yan and R. Zhang, A comprehensive classification method for VOC emission sources to tackle air pollution based on VOC species reactivity and emission amounts, *J. Environ. Sci. (China)*, 2018, **67**, 78-88.
5. J. Shi, H. Deng, Z. Bai, S. Kong, X. Wang, J. Hao, X. Han and P. Ning, Emission and profile characteristic of volatile organic compounds emitted from coke production, iron smelt, heating station and power plant in Liaoning Province, China, *Sci. Total Environ.*, 2015, **515-516**, 101-108.
6. M. Jackson, Organic liquids storage tanks volatile organic compounds (VOCS) emissions dispersion and risk assessment in developing countries: the case of Dar-es-Salaam City, Tanzania, *Environ. Monit. Assess.*, 2006, **116**, 363-382.
7. Q. Wang, S. Li, M. Dong, W. Li, X. Gao, R. Ye and D. Zhang, VOCs emission characteristics and priority control analysis based on VOCs emission inventories and ozone formation potentials in Zhoushan, *Atmos. Environ.*, 2018, **182**, 234-241.
8. K. Na, Y. Kim, I. Moon and K. Moon, Chemical composition of major VOC emission sources in the Seoul atmosphere, *Chemosphere*, 2004, **55**, 585-594.
9. Q. He, Y. Yan, H. Li, Y. Zhang, L. Chen and Y. Wang, Characteristics and reactivity of volatile organic compounds from non-coal emission sources in China, *Atmos. Environ.*, 2015, **115**, 153-162.
10. J. Zheng, Y. Yu, Z. Mo, Z. Zhang, X. Wang, S. Yin, K. Peng, Y. Yang, X. Feng and H. Cai, Industrial sector-based volatile organic compound (VOC) source profiles measured in manufacturing facilities in the Pearl River Delta, China, *Sci. Total Environ.*, 2013, **456-457**, 127-136.
11. K. Cheng, W.-W. Hao, P. Yi, Y. Zhang and J.-Y. Zhang, Volatile Organic Compounds Emission from Chinese Wood Furniture Coating Industry: Activity-based Emission Factor, Speciation Profiles, and Provincial Emission Inventory, *Aerosol Air Qual. Res.*, 2018, **18**, 2813-2825.
12. Z. Zhong, Q. Sha, J. Zheng, Z. Yuan, Z. Gao, J. Ou, Z. Zheng, C. Li and Z. Huang, Sector-based VOCs emission factors and source profiles for the surface coating industry in the Pearl River Delta region of China, *Sci. Total Environ.*, 2017, **583**, 19-28.
13. F. Li, J. Niu and L. Zhang, A physically-based model for prediction of VOCs emissions from paint applied to an absorptive substrate, *Build. Environ.*, 2006, **41**, 1317-1325.
14. H. Wang, L. Nie, J. Li, Y. Wang, G. Wang, J. Wang and Z. Hao, Characterization and assessment of volatile organic compounds (VOCs) emissions from typical industries, *Chin. Sci. Bull.*, 2013, **58**, 724-730.
15. R. Tong, X. Ma, Y. Zhang, G. Shao and M. Shi, Source analysis and health risk-assessment of ambient volatile organic compounds in automobile manufacturing processes, *Hum. Ecol. Risk Assess.*, 2018, **26**, 1-25.
16. J. Colman Lerner, E. Sanchez, J. Sambeth and A. Porta, Characterization and health risk assessment of VOCs in occupational environments in Buenos Aires, Argentina, *Atmos. Environ.*, 2012, **55**, 440-447.

17. Z. Zhou, W. Fang, Q. Luo, X. Wang and L. Wu, Emission characteristics of volatile organic compounds from automobile coating industry in Chongqing city, *J. Environ. Sci. Eng. B*, 2017, **6**, 543-552.
18. S. Batterman, T. Metts, P. Kalliokoski and E. Barnett, Low-flow active and passive sampling of VOCs using thermal desorption tubes: theory and application at an offset printing facility, *J. Environ. Monit.*, 2002, **4**, 361-370.
19. H. Wang, Y. Qiao, C. Chen, J. Lu, H. Dai, L. Qiao, S. Lou, C. Huang, L. Li, S. Jing and J. Wu, Source profiles and chemical reactivity of volatile organic compounds from solvent use in Shanghai, China, *Aerosol Air Qual. Res.*, 2014, **14**, 301-310.
20. B. Yuan, M. Shao, S. Lu and B. Wang, Source profiles of volatile organic compounds associated with solvent use in Beijing, China, *Atmos. Environ.*, 2010, **44**, 1919-1926.
21. Y. Zhao, P. Mao, Y. Zhou, Y. Yang, J. Zhang, S. Wang, Y. Dong, F. Xie, Y. Yu and W. Li, Improved provincial emission inventory and speciation profiles of anthropogenic non-methane volatile organic compounds: a case study for Jiangsu, China, *Atmos. Chem. Phys.*, 2017, **17**, 7733-7756.
22. B. Pan and B. Xing, Adsorption Mechanisms of Organic Chemicals on Carbon Nanotubes, *Environ. Sci. Technol.*, 2008, **42**, 9005-9013.
